# Supplementary material
Source: PubMed Central journal article supplement (PMC3486582)
Supplement: AAC.01267-12_zac999101367so1.pdf [file AAC.01267-12_zac999101367so1.pdf]

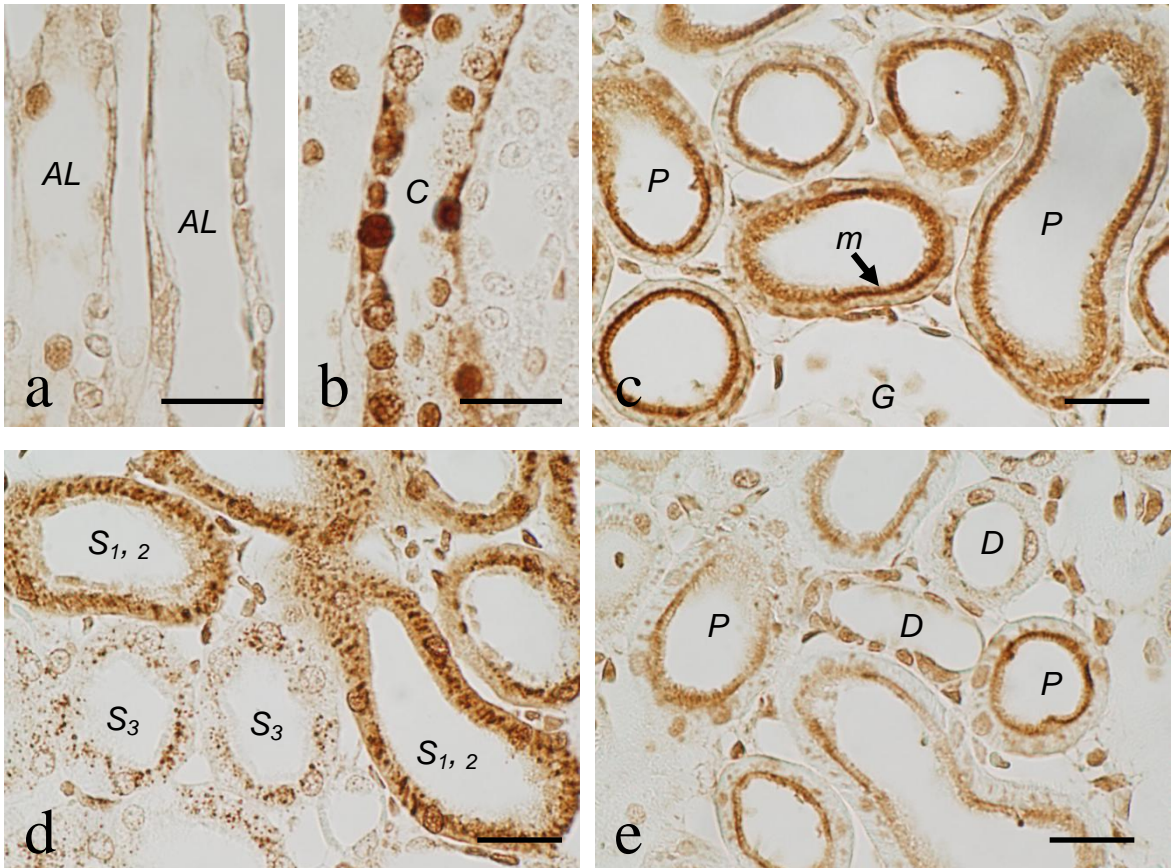

Figure legends for the “data not shown<sup>a-e</sup>” in the text

Immunostaining for VM in kidney of rats administered VM. Rats were i.v. administered VM at 33.3 mg/kg, and then sacrificed 3-h (*a, b*), or 24 h (*c-e*) later. ICC was carried out using a dilution (1: 60) of the culture supernatant of AVM-113 mAb following digestion of sections with protease at 0.003 % at 30 ° C for 15 min (*a, e*), 1 h (*c*) or 2 h (*b, d*). Higher (*a-e*) magnification: *a* Weak staining for VM in the ascending limb cells. *b* The two cell types of the collecting duct cells stained heavily and weakly. The cytoplasmic granular staining was observed in the weakly stained cells. *c* Heavy staining on the microvilli of the proximal tubule cells. *d* The two cell types of the proximal tubule cells stained heavily and weakly in S1 or S2 segments and S3 segments, respectively. *e* Moderate or weak staining occurred in both the apical cytoplasm and nuclei of the convoluted distal tubule cells, in all of which intact cell morphology was observed.

*AL* ascending limb, *G* glomeruli, *C* collecting duct, *P* proximal tubule, *D* distal tubule, *S<sub>1, 2</sub>* S1 or S2 segment, *S<sub>3</sub>* S3 segment, *m* microvilli.

Bar = 20 μm.
